# Supplementary material for: Warm conveyor belt activity over the Pacific: modulation by the Madden–Julian Oscillation and impact on tropical–extratropical teleconnections
Source: Copernicus journal article supplement (doi:10.5194/wcd-5-65-2024), 2024-01-19
Supplement: Supplementary file 1 [file wcd-5-65-2024-supplement.pdf]

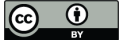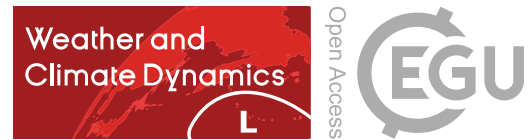

*Supplement of*

**Warm conveyor belt activity over the Pacific: modulation by the Madden–Julian Oscillation and impact on tropical–extratropical teleconnections**

**Julian F. Quinting et al.**

*Correspondence to:* Julian F. Quinting ([julian.quinting@kit.edu](mailto:julian.quinting@kit.edu))

The copyright of individual parts of the supplement might differ from the article licence.

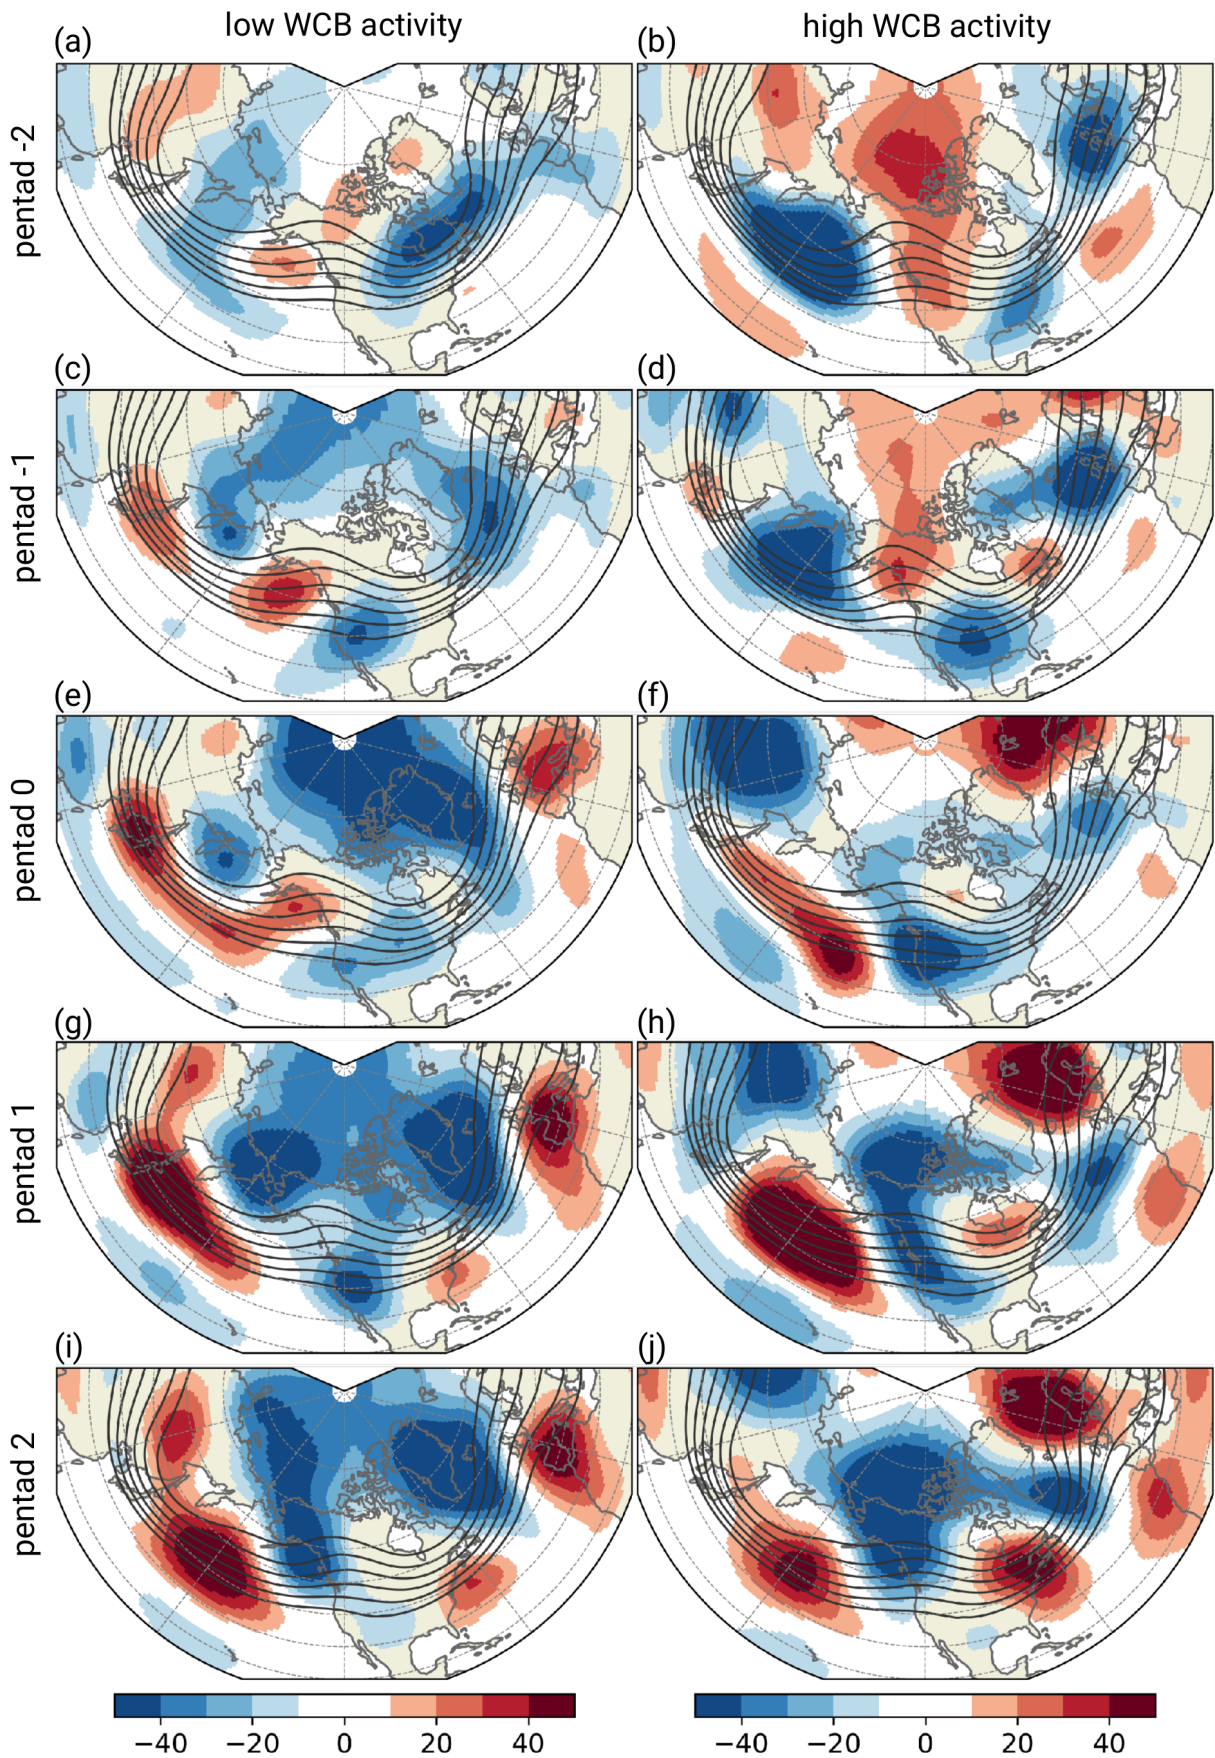

Figure S1: Composites of 300-hPa geopotential height anomalies (shading in gpm) and mean geopotential height (contours at 8700, 8800, 8900, 9000, 9100, 9200 gpm) for MJO phase 2 with (a, c, e, g, i) low WCB activity and (b, d, f, h, j) high WCB activity at pentads -2, -1, 0, 1, 2.



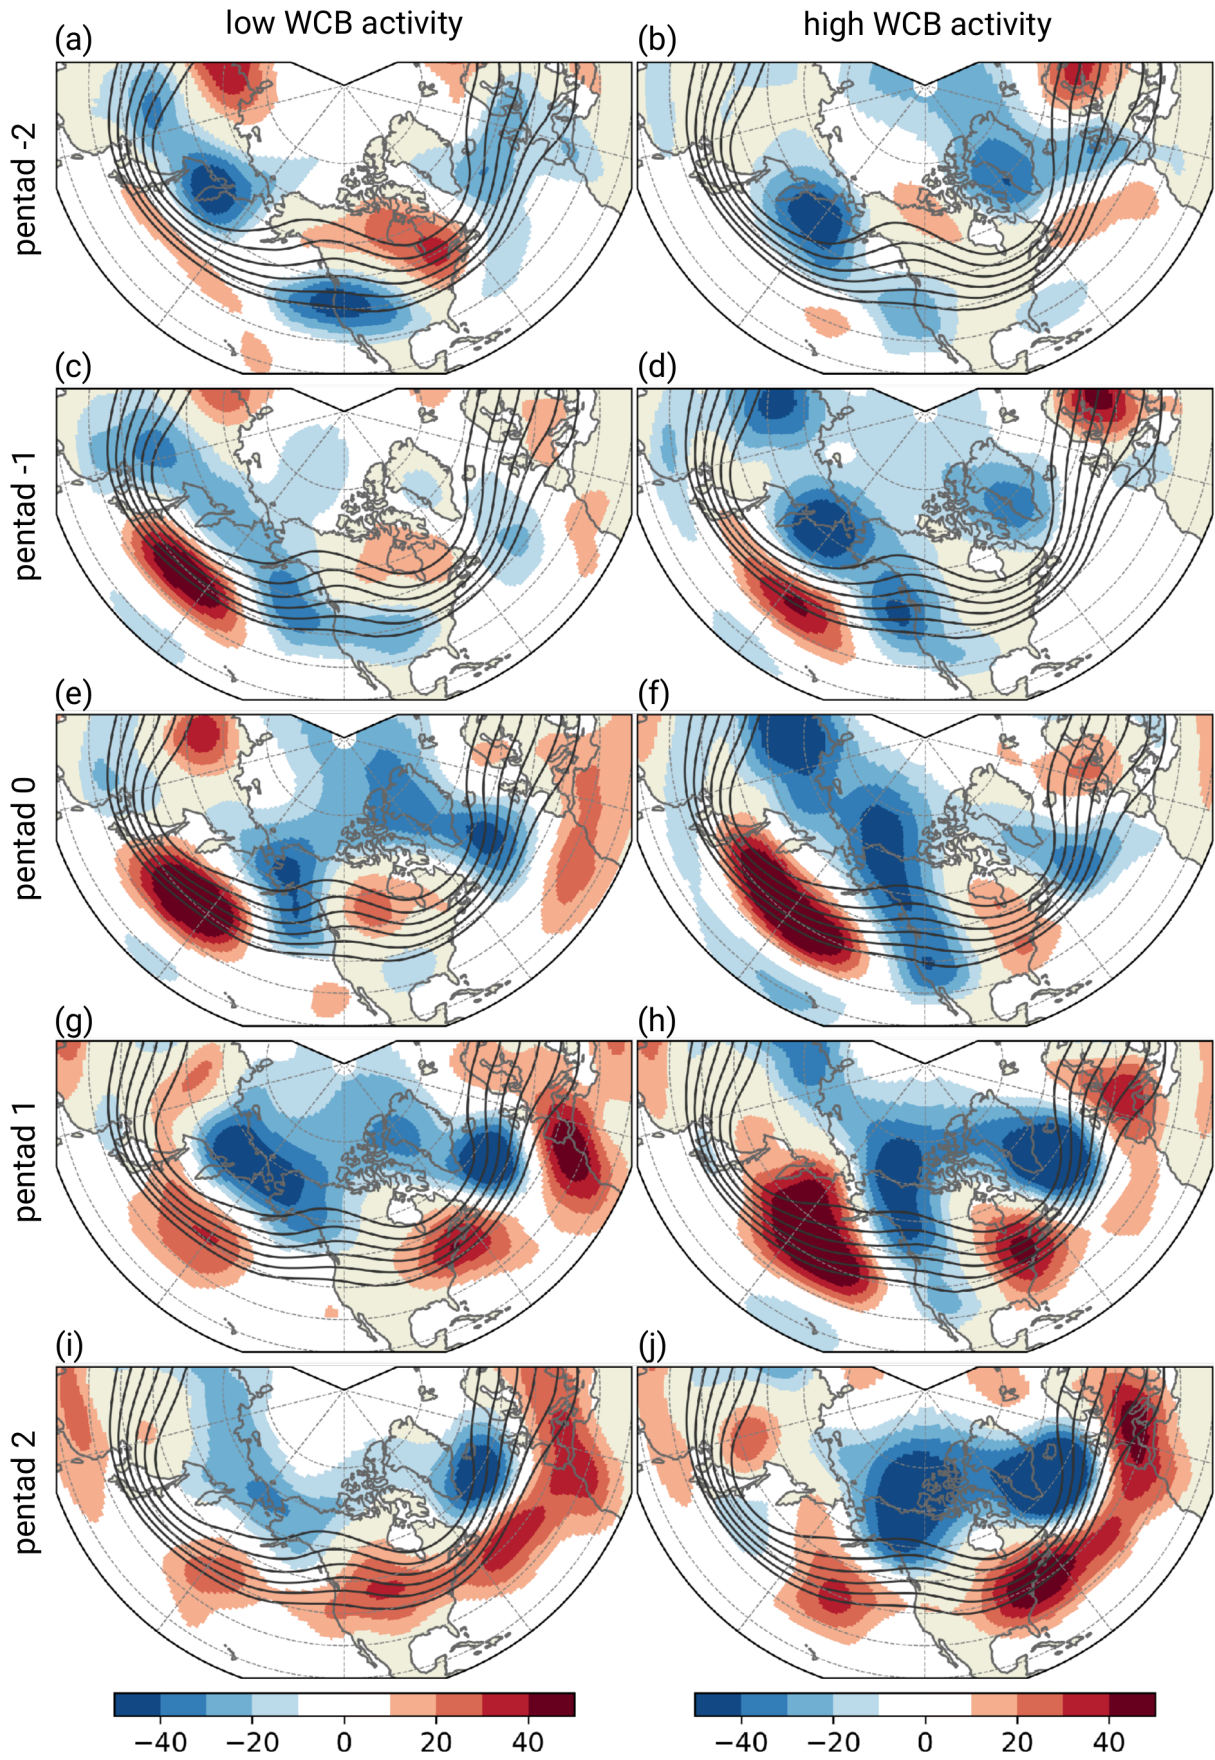

Figure S2: Same as Fig. S1, but for MJO phase 3.

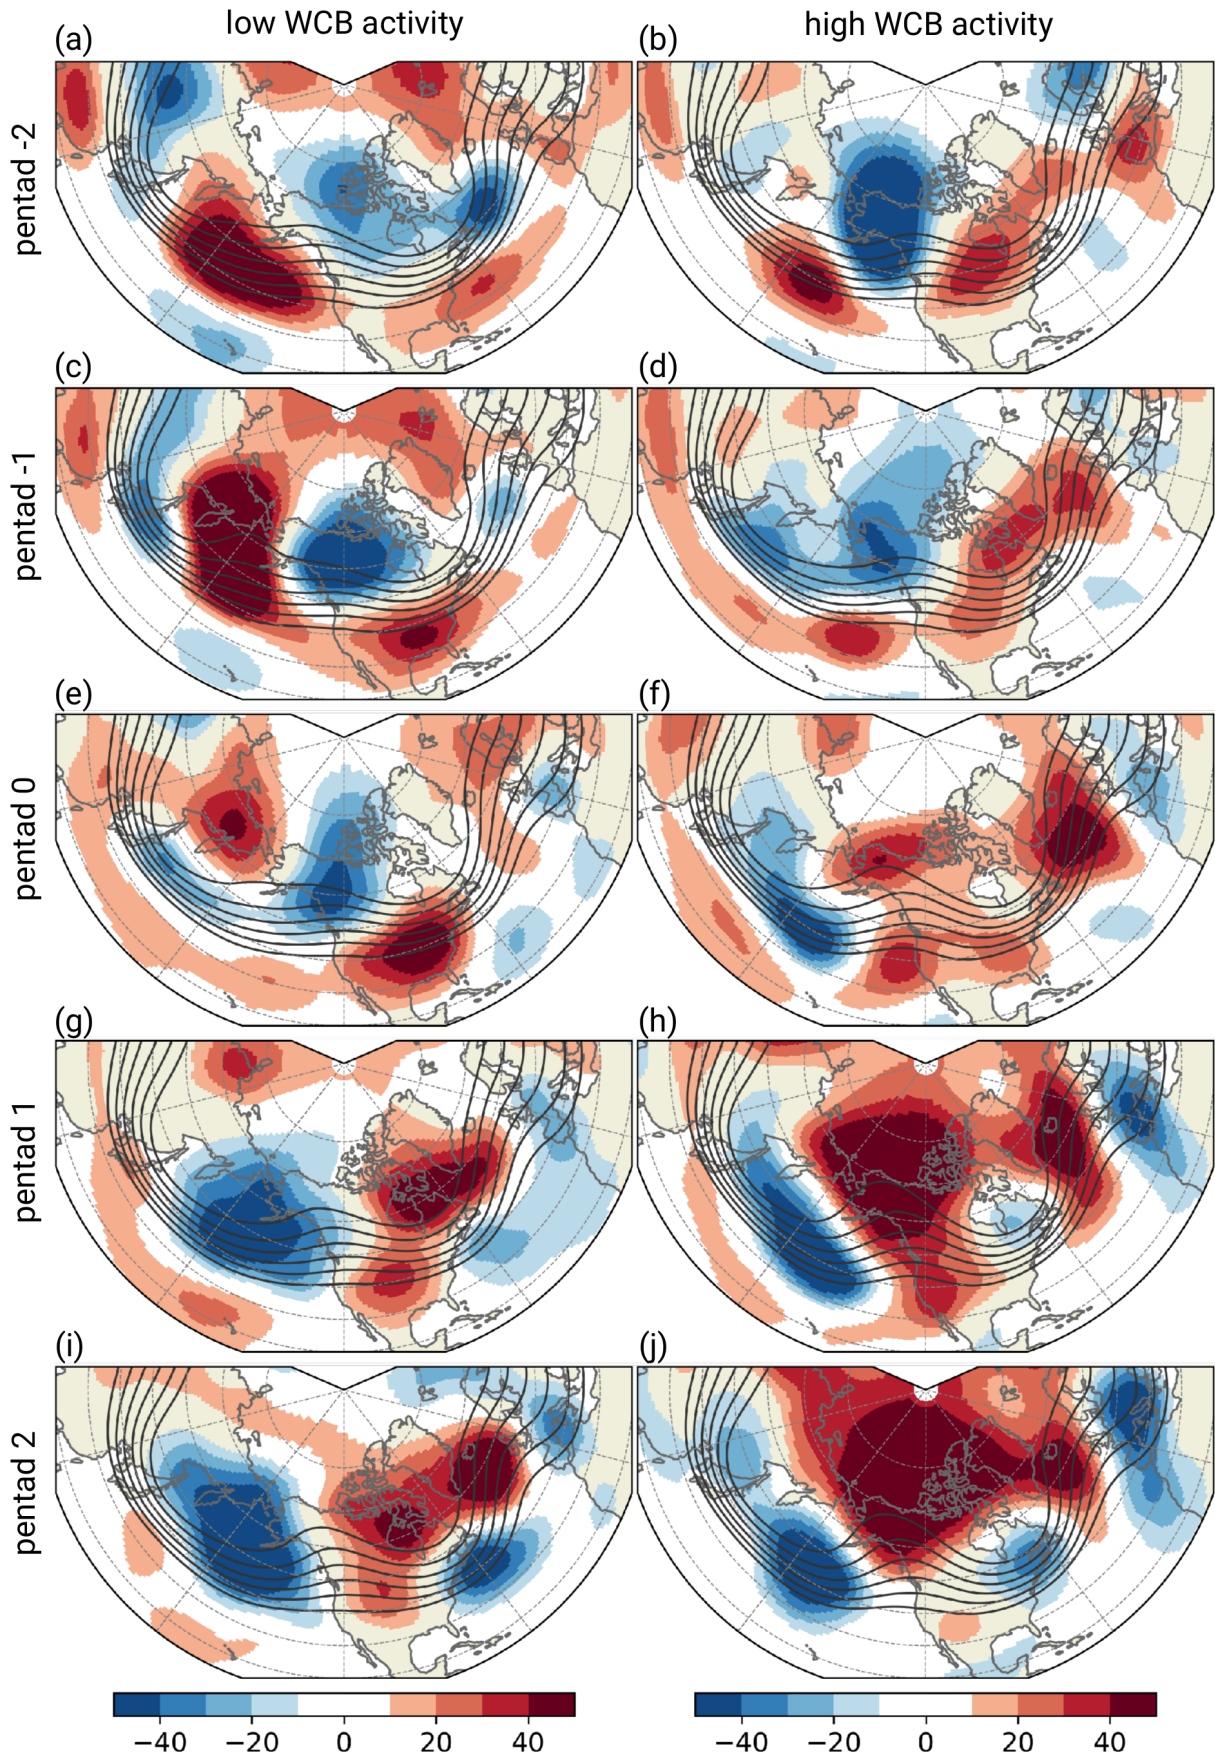

Figure S3: Same as Fig. S1, but for MJO phase 6.



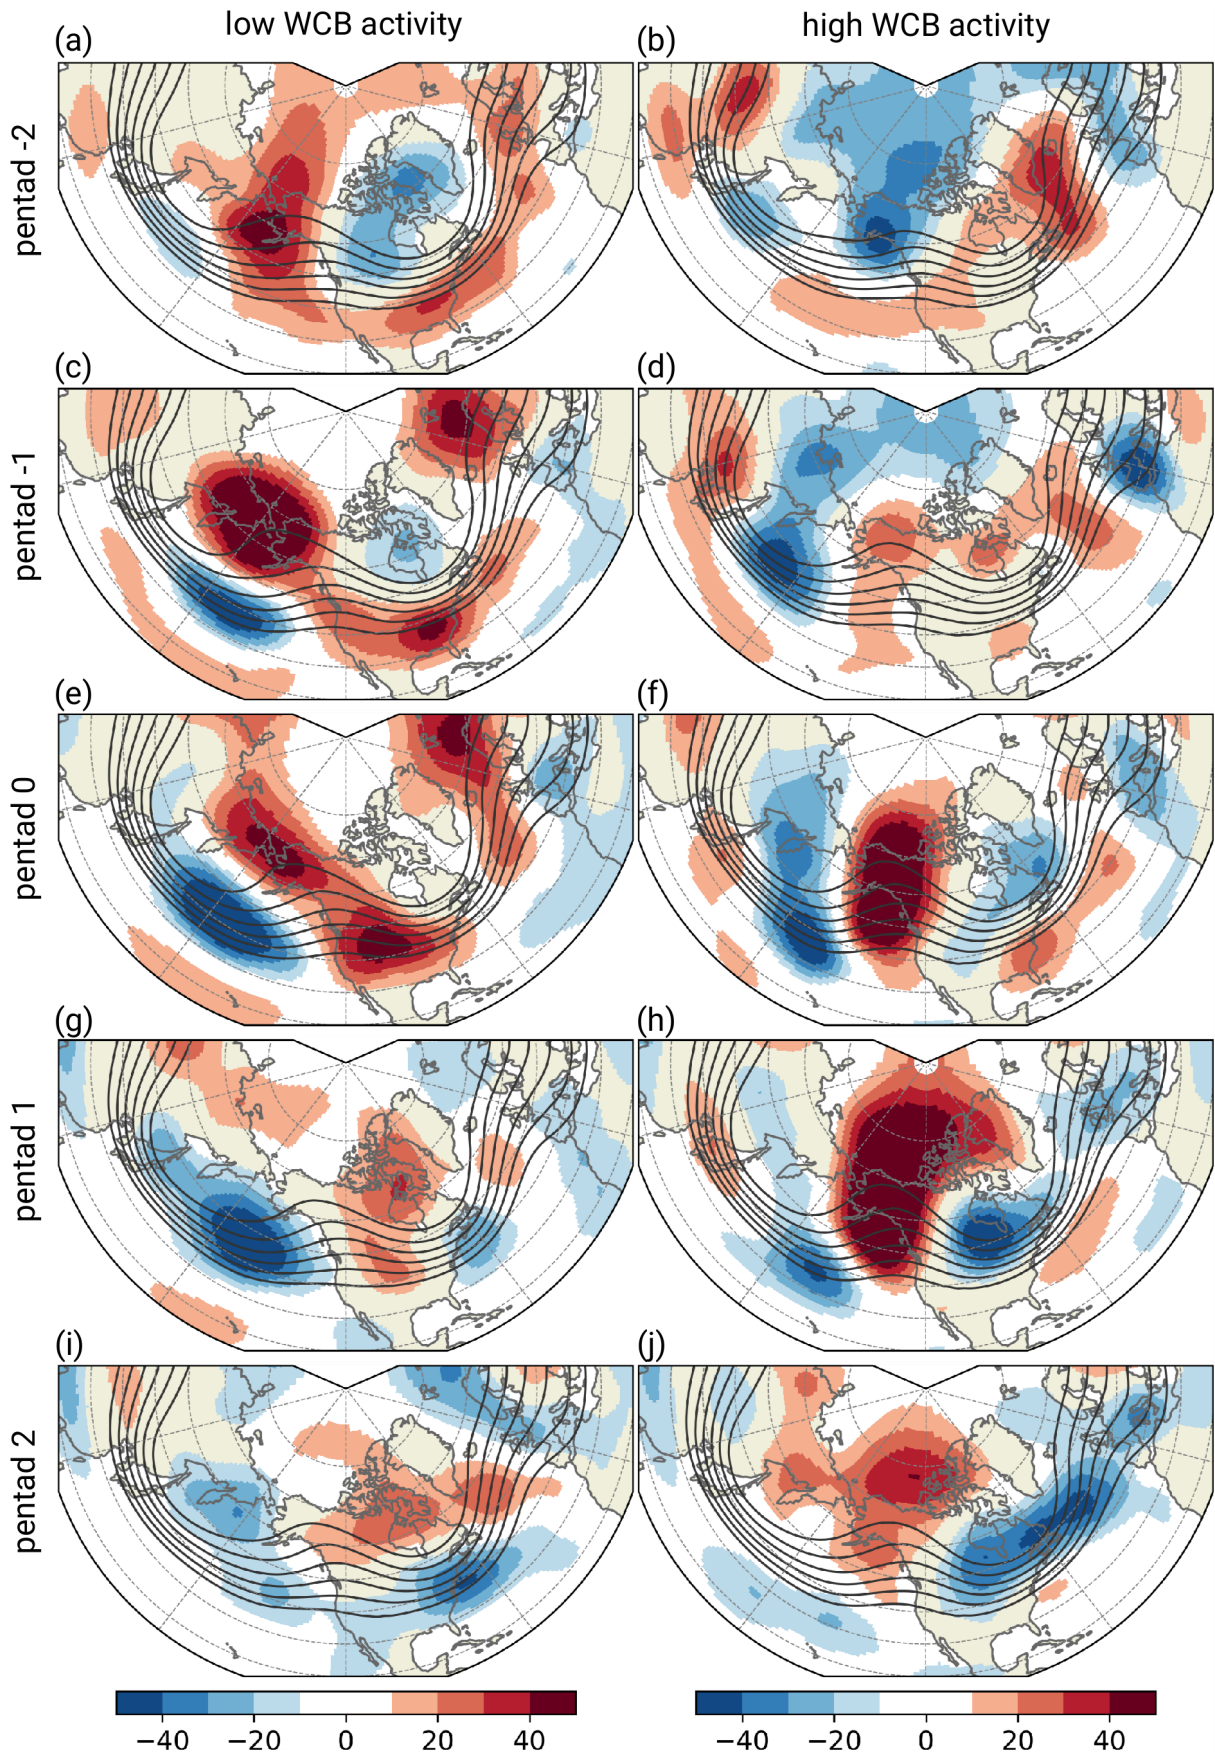

Figure S4: Same as Fig. S1, but for MJO phase 7.

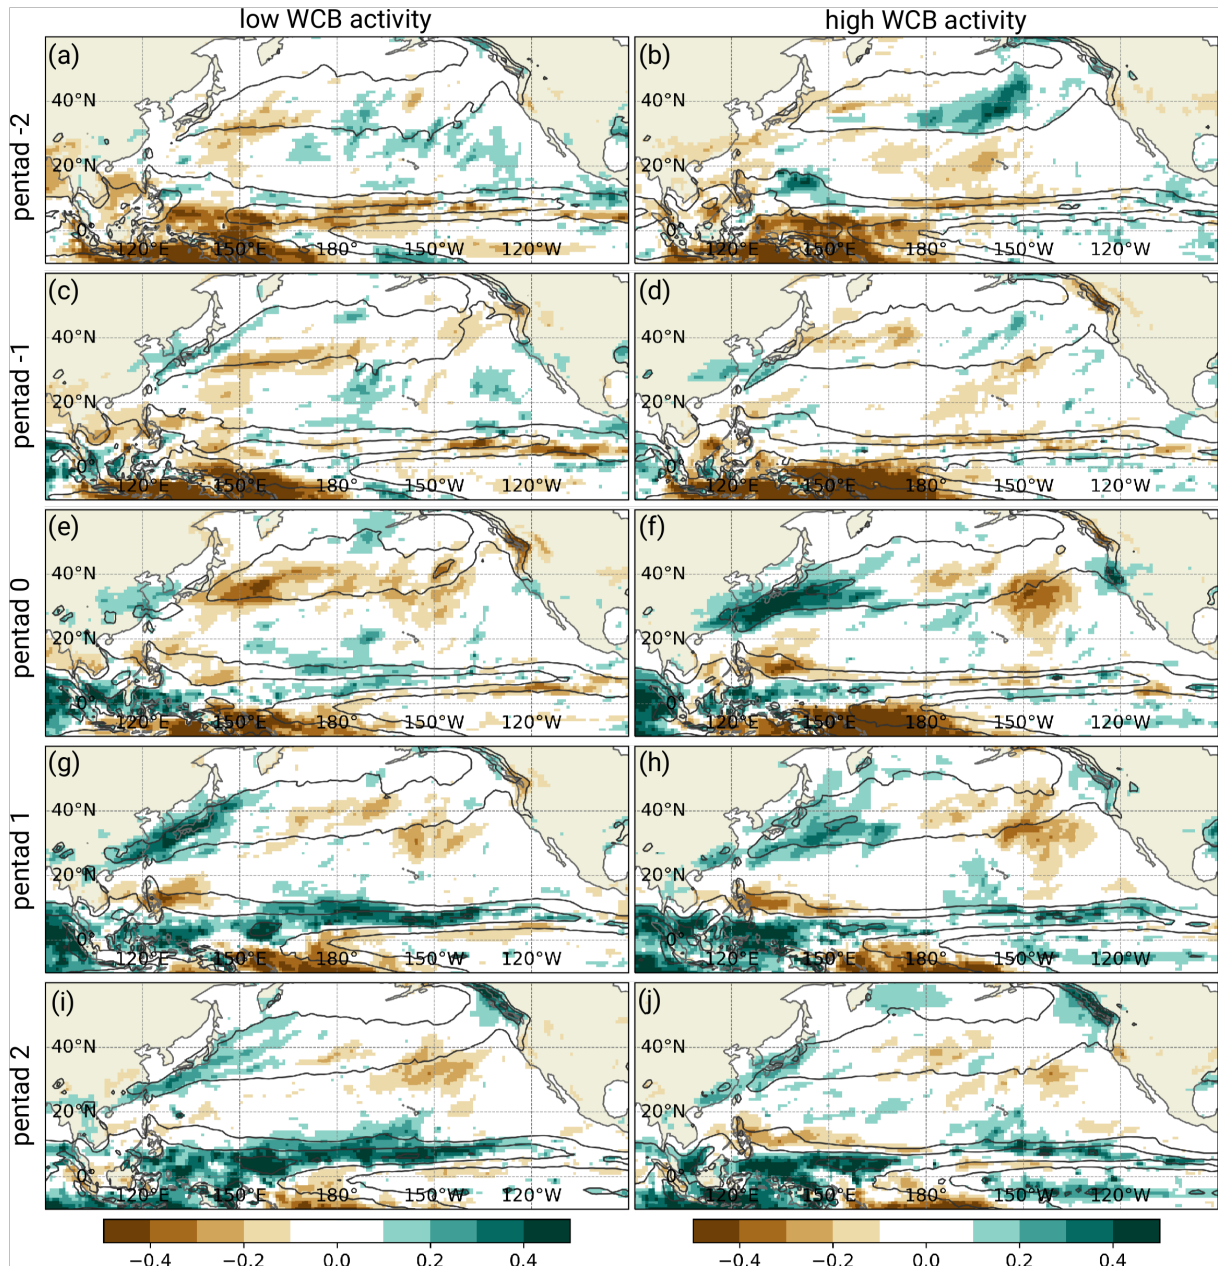

Figure S5: Composites of precipitation anomalies (shading in  $\text{mm (6 h)}^{-1}$ ) and mean precipitation (black contours at 1, 2, 3, 4  $\text{mm (6 h)}^{-1}$ ) for MJO phase 2 with (a, c, e, g, i) low WCB activity and (b, d, f, h, j) high WCB activity at pentads -2, -1, 0, 1, 2.



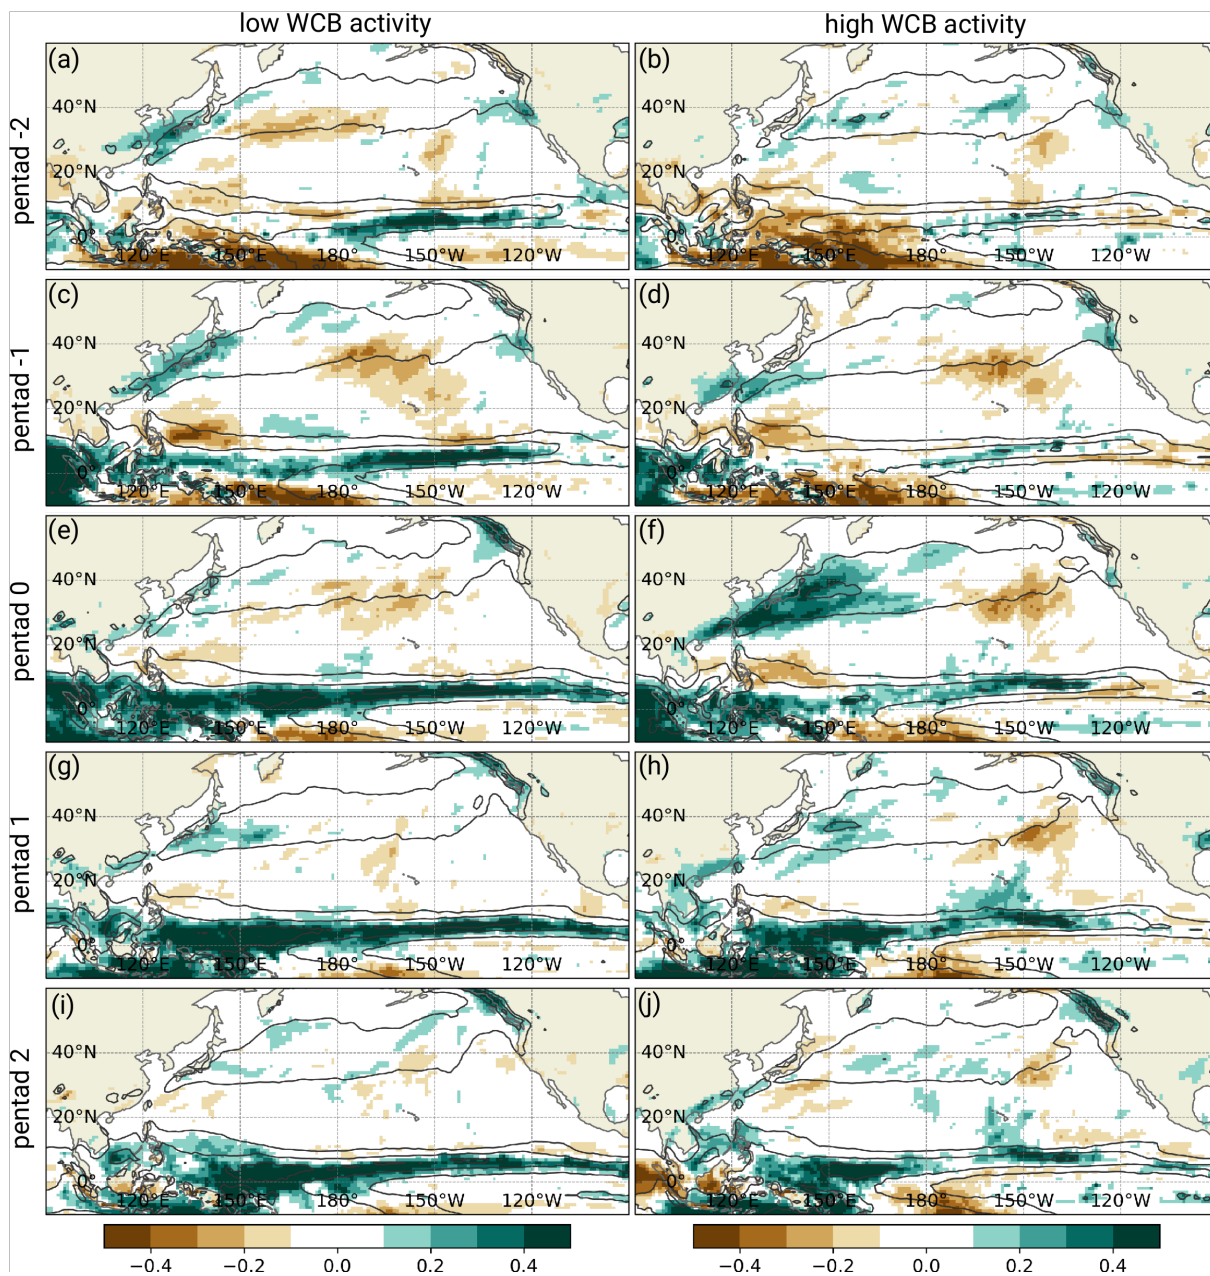

Figure S6: Same as Fig. S5, but for MJO phase 3.

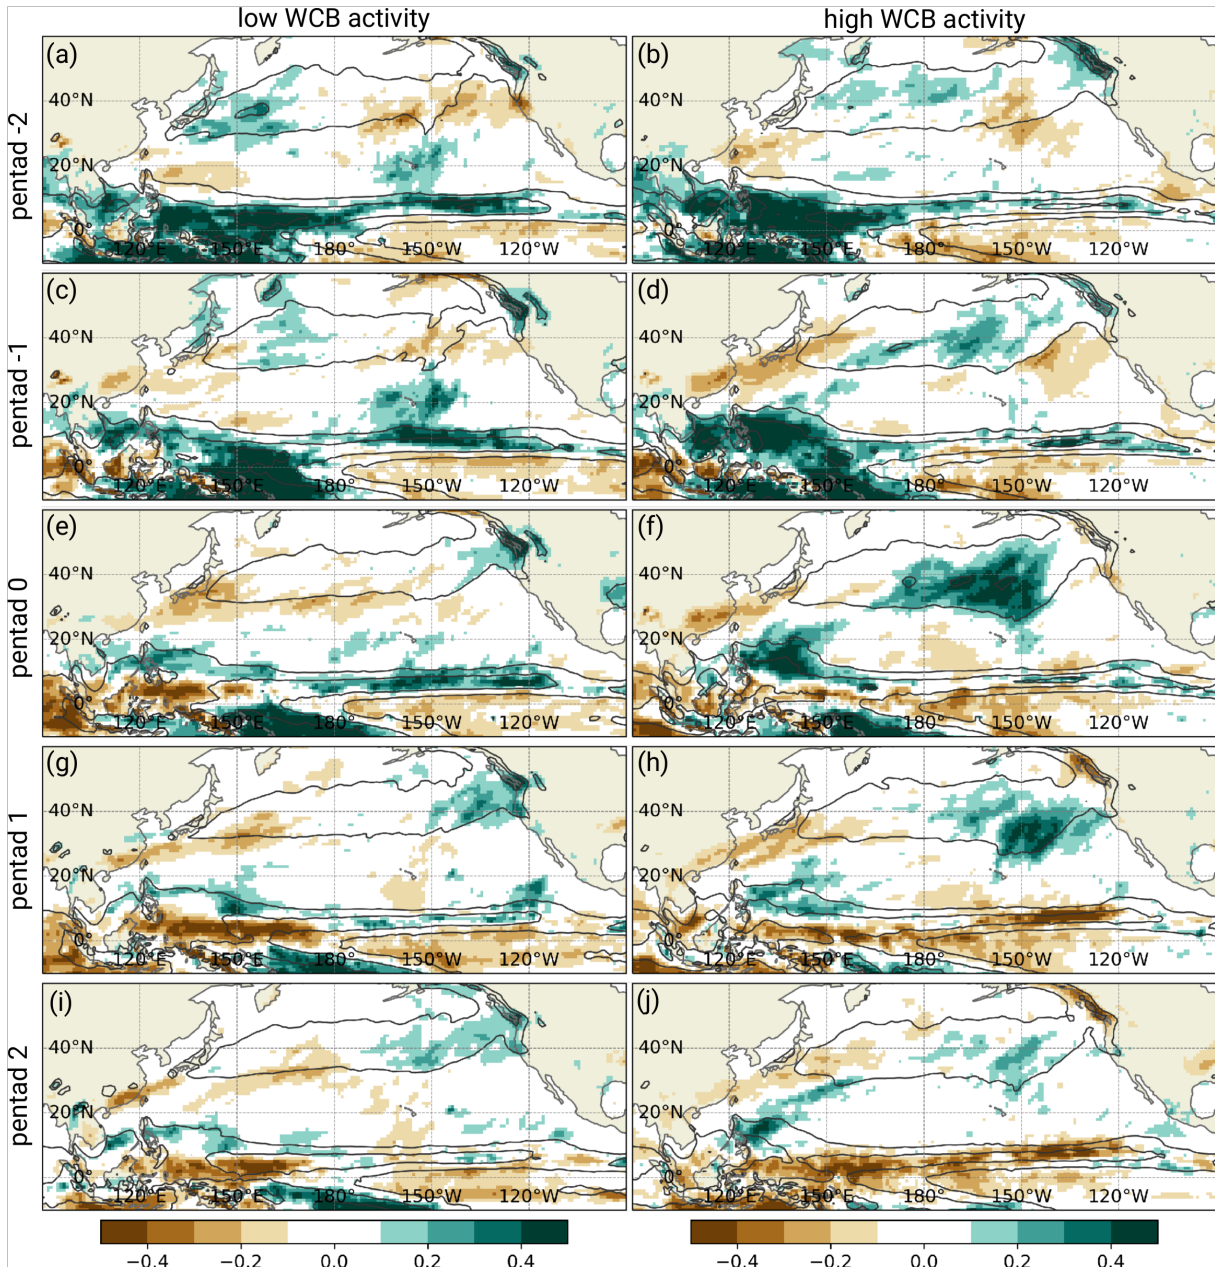

Figure S7: Same as Fig. S5, but for MJO phase 6.



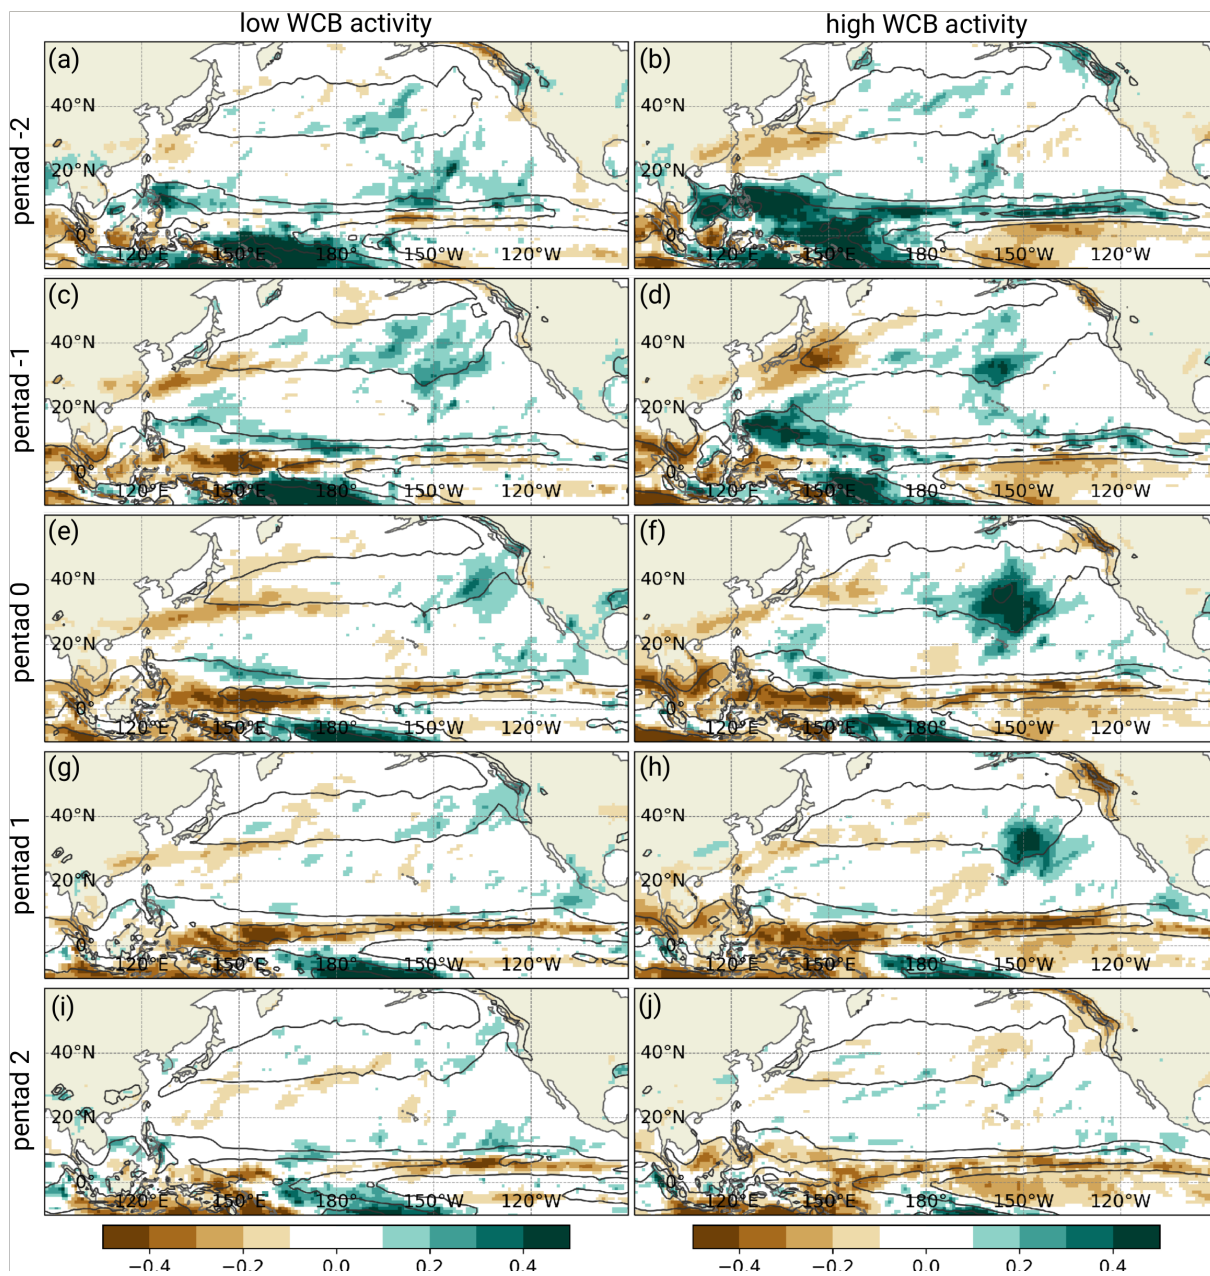

Figure S8: Same as Fig. S5, but for MJO phase 7.
